# Supplementary material for: Evolution of biofilm-adapted gene expression profiles in lasR-deficient clinical Pseudomonas aeruginosa isolates
Source: PubMed Central journal article supplement (PMC8844440; doi:10.1038/s41522-022-00268-1), 2022-02-14
Supplement: 41522_2022_268_MOESM1_ESM.pdf [file 41522_2022_268_MOESM1_ESM.pdf]

## Supplementary Information

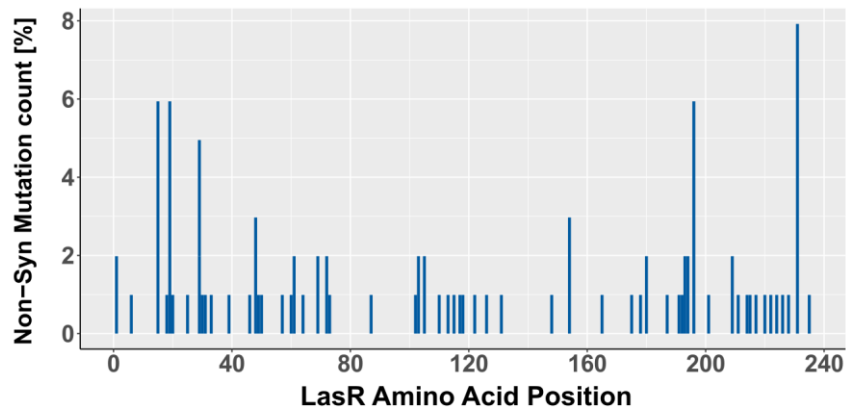

**Supplementary Figure 1: Mapping of the non-synonymous amino acid exchanges to the LasR PAO1 and PA14 reference.** The *lasR* gene sequences of all 414 clinical isolates that harbored non-synonymous sequence variations within *lasR* were mapped to their amino acid position within the protein. The *lasR* gene sequence of PA14 and PAO1 served as a reference. The relative number of clinical isolates harboring the respective amino acid variation is shown. Insertions/Deletions and premature stop codons were excluded.

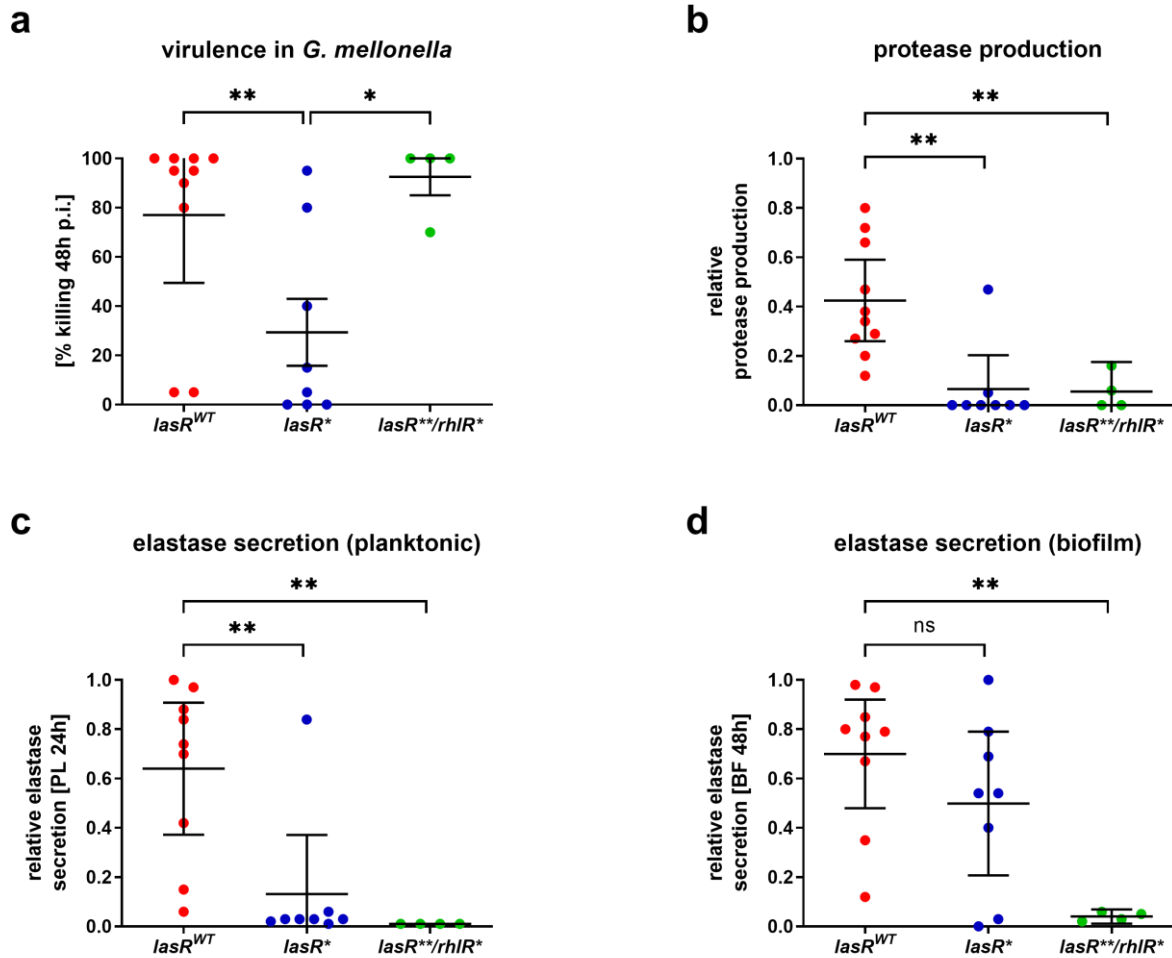

**Supplementary Figure 2: Selected clinical isolates exhibit distinct phenotypic characteristics based on their allele status of the *lasR* and *rhIR* genes.** Strains with a defective LasR (*lasR<sup>\*</sup>*) are significantly less virulent than wild-type isolates (*lasR<sup>WT</sup>*) or strains lacking functional LasR and RhIR (*lasR<sup>\*\*</sup>/rhIR<sup>\*</sup>*) in an *in vivo* *Galleria mellonella* infection model (a). Protease production and elastase secretion (planktonic growth) are significantly reduced in *lasR<sup>\*</sup>* and *lasR<sup>\*\*</sup>/rhIR<sup>\*</sup>* isolates compared with *lasR<sup>WT</sup>* (b + c). Elastase secretion for *lasR<sup>\*</sup>*, but not *lasR<sup>\*\*</sup>/rhIR<sup>\*</sup>* strains, is restored when cultivated under biofilm growth conditions (d). Each dot represents an individual clinical isolate. The solid line represents the mean and the whiskers display the 95 %-confidence intervals. Levels of statistical significance were calculated using Kruskal-Wallis and Mann-Whitney tests and are indicated as \*\* ( $p$ -value < 0.01), or \* ( $p$ -value < 0.05).

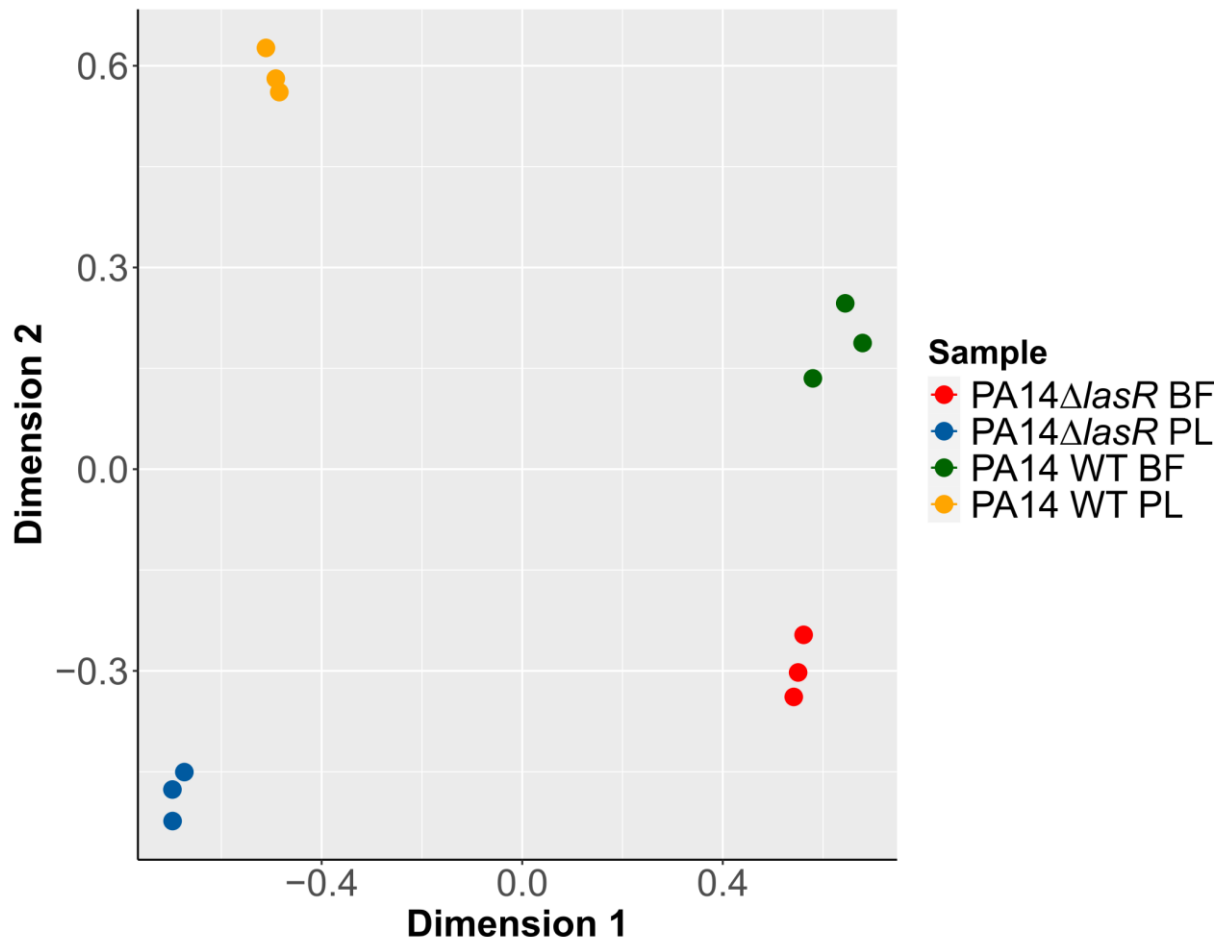

**Supplementary Figure 3: Transcriptomes of *P. aeruginosa* PA14 and its  $\Delta lasR$  mutant under biofilm and planktonic growth conditions.** MDS plot depicts normalized global gene expression values of PA14 WT and its clean *lasR* deletion mutant (PA14 $\Delta lasR$ ) under planktonic growth conditions (in yellow and blue) and 48h biofilm growth (in green and red).

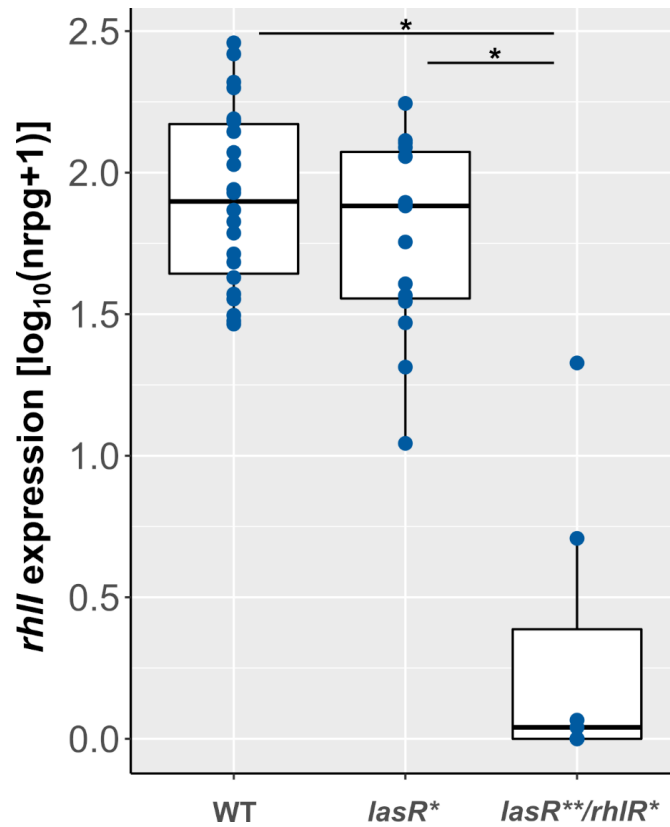

**Supplementary Figure 4: *lasR\*\*/rhIR\** clinical isolates exhibit a reduced *rhII* expression compared to *lasR\** and wild-type isolates.** Expression of *rhII* encoding the autoinducer synthase RhII in clinical *P. aeruginosa* isolates is depicted. Clinical isolates with InDel mutations or premature stop codons in either only *lasR* (*lasR\**; n = 15), both *lasR* and *rhIR* (*lasR\*\*/rhIR\**; n = 7) or in none of the two genes (WT; n = 22) were included in the analysis. The 7 *lasR\*\*/rhIR\** isolates also included strains exhibiting non-synonymous amino acid exchanges in the gene sequence of *lasR*. Reads are shown as  $\log_{10}$  normalized million reads per gene. A value of 1 was added to all nrpg values prior to  $\log_{10}$  transformation in order to prevent the creation of infinite values. Each box includes 50% of the data.  $p$ -values < 0.05 (Wilcoxon rank sum test) are marked with an asterisk.

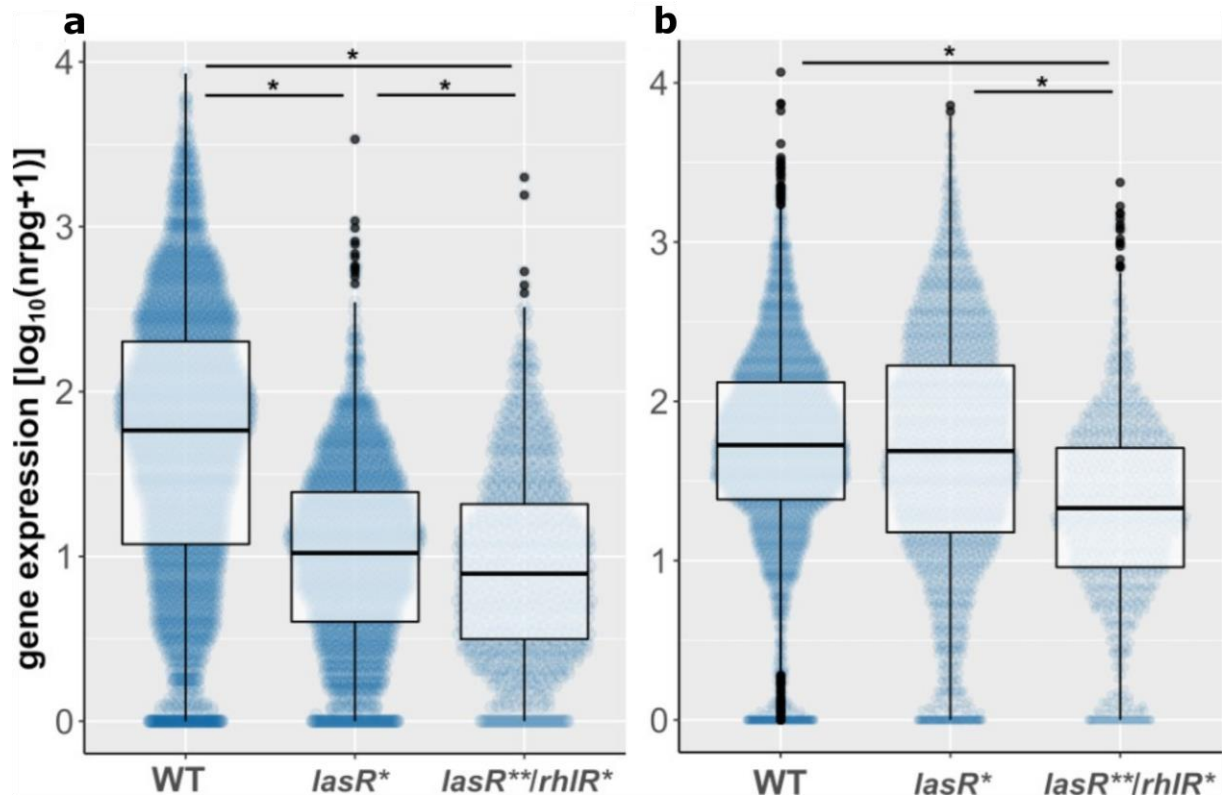

**Supplementary Figure 5: Expression of all LasR core regulon genes (n = 138) among the *lasR*<sup>WT</sup>, *lasR*<sup>\*</sup> and *lasR*<sup>\*\*</sup>/*rhIR*<sup>\*</sup> isolates.** Gene expression values ( $\log_{10}(\text{nrpg}+1)$ ) of the core *lasR* regulon genes in the *lasR*<sup>WT</sup> (n = 22), *lasR*<sup>\*</sup> (n = 15) and *lasR*<sup>\*\*</sup>/*rhIR*<sup>\*</sup> (n = 7) clinical isolates under planktonic (a) and biofilm (b) growth conditions. Asterisk:  $p$ -value < 0.05 (Wilcoxon rank sum test).

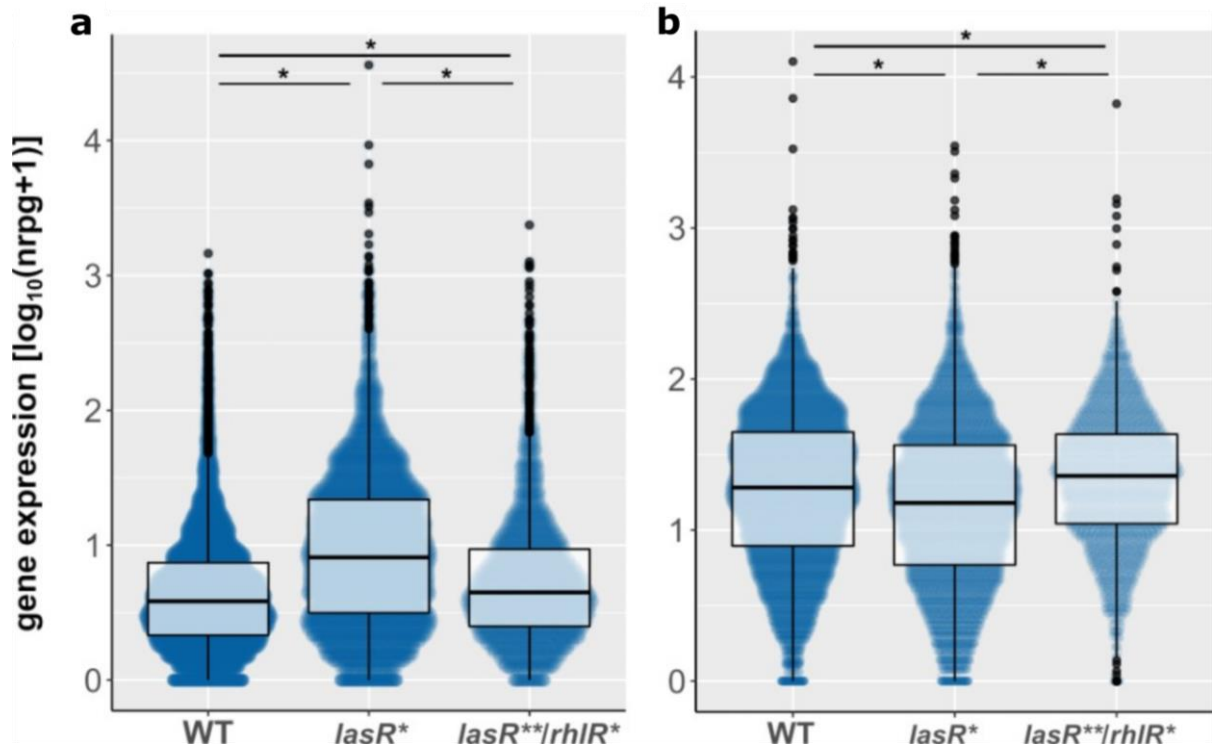

**Supplementary Figure 6: Expression of all genes that are negatively affected by the presence of *lasR* among the *lasR*<sup>WT</sup>, *lasR*<sup>\*</sup> and *lasR*<sup>\*\*</sup>/*rhIR*<sup>\*</sup> isolates.** Gene expression values ( $\log_{10}(\text{nrpg}+1)$ ) of the *lasR* repressed genes in the *lasR*<sup>WT</sup> (n = 22), *lasR*<sup>\*</sup> (n = 15) and *lasR*<sup>\*\*</sup>/*rhIR*<sup>\*</sup> (n = 7) clinical isolates under planktonic (a) and biofilm (b) growth conditions. Asterisk:  $p$ -value < 0.05 (Wilcoxon rank sum test).

**Supplementary Figure 7: Bi-modal genes show characteristic expression patterns in a collection of 414 clinical *P. aeruginosa* isolates.** Figures display distributions and cut-off visualization. Density plots for each of the identified 136 genes with an at least bi-modal pattern display the expression distribution (based on normalized expression values; y-axis) across the population of strains (x-axis). Multimodality was calculated using the R package *multimode* in default mode, a corrected *p*-value of < 0.1 was used as a threshold. Red lines indicate expression cut-offs between lowly expressing and highly expressing isolates. *n* = number of analyzed isolates; Bandwidth = value used in the density() function (default mode) of R to smoothen the plot.

**PA14\_01140**

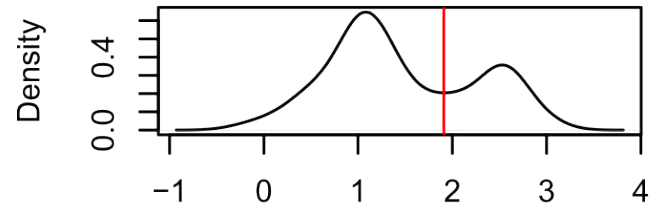

N = 416 Bandwidth = 0.2116

**PA14\_01760,nuh**

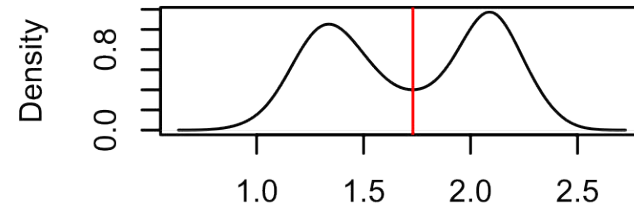

N = 416 Bandwidth = 0.1033

**PA14\_05540,mexB**

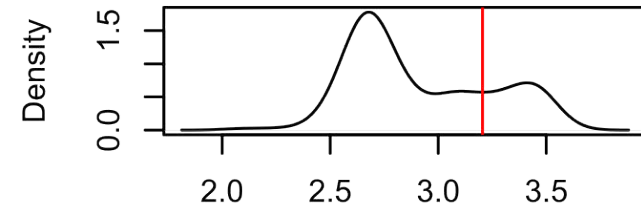

N = 416 Bandwidth = 0.08809

**PA14\_05550,oprM**

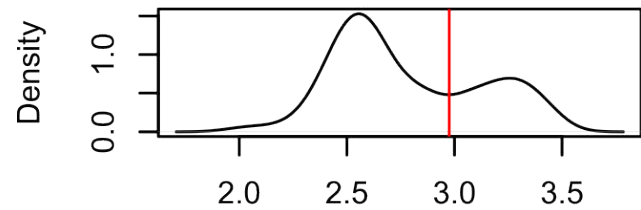

N = 416 Bandwidth = 0.09293

**PA14\_06160,fiuA**

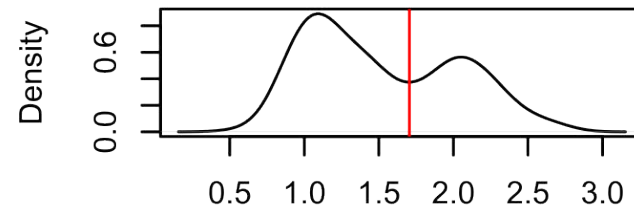

N = 416 Bandwidth = 0.1364

**PA14\_07430**

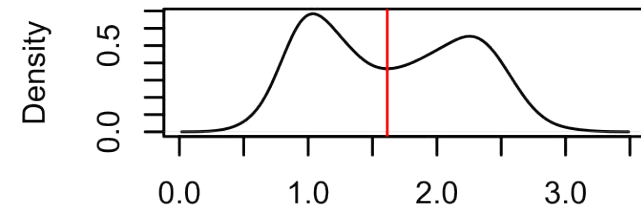

N = 416 Bandwidth = 0.1606

**PA14\_08200**

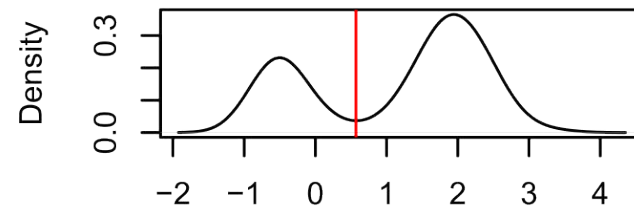

N = 416 Bandwidth = 0.3423

**PA14\_08210**

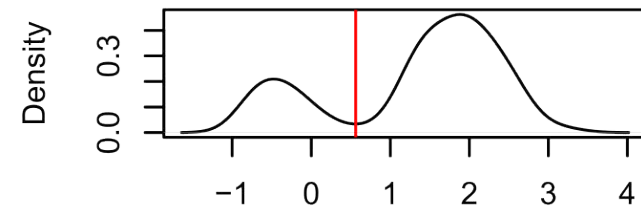

N = 416 Bandwidth = 0.2568



**PA14\_08220**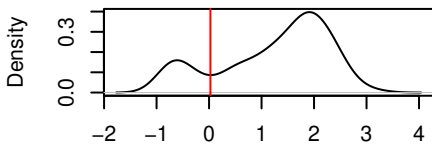

N = 416 Bandwidth = 0.2913

**PA14\_08240**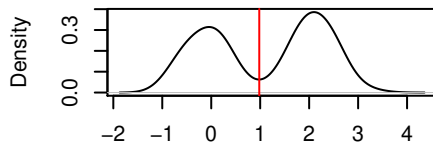

N = 416 Bandwidth = 0.3231

**PA14\_08270**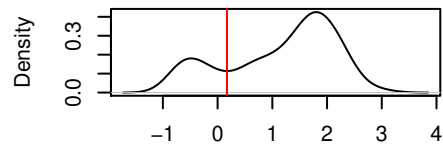

N = 416 Bandwidth = 0.2765

**PA14\_08280**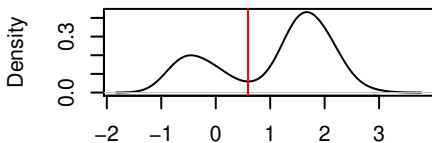

N = 416 Bandwidth = 0.2927

**PA14\_08300,JF1**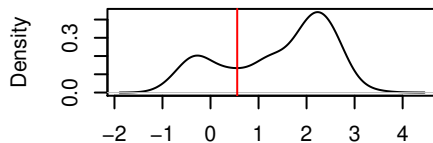

N = 416 Bandwidth = 0.3003

**PA14\_08310**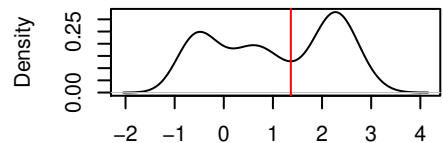

N = 416 Bandwidth = 0.3386

**PA14\_08330**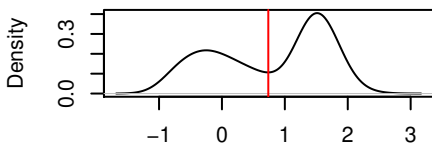

N = 416 Bandwidth = 0.2617

**PA14\_09210,pchA**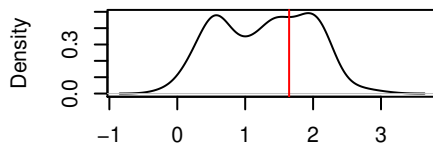

N = 416 Bandwidth = 0.1846

**PA14\_09230,pchC**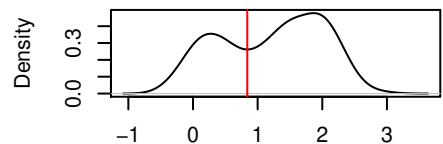

N = 416 Bandwidth = 0.2151

**PA14\_09280,pchF**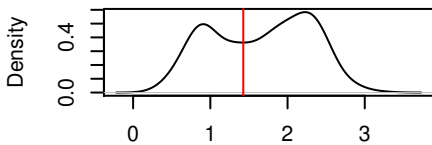

N = 416 Bandwidth = 0.1734

**PA14\_09300,pchH**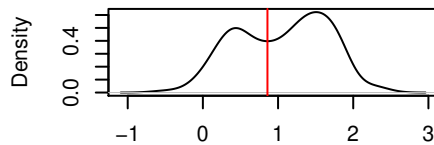

N = 416 Bandwidth = 0.1637

**PA14\_09320,pchl**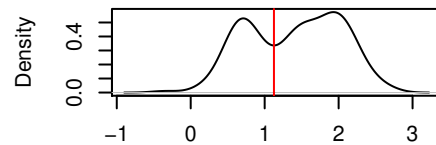

N = 416 Bandwidth = 0.1703

**PA14\_09340,fpfA**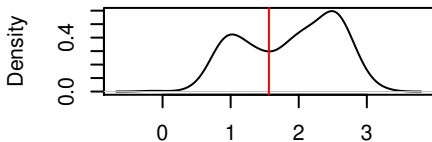

N = 416 Bandwidth = 0.1854

**PA14\_09700,pqsL**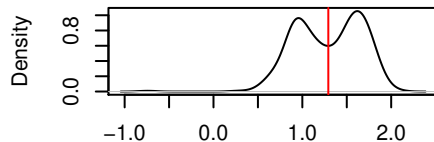

N = 416 Bandwidth = 0.1015

**PA14\_09900,prpL**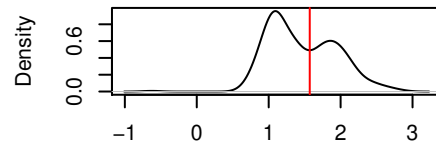

N = 416 Bandwidth = 0.1285

**PA14\_10490**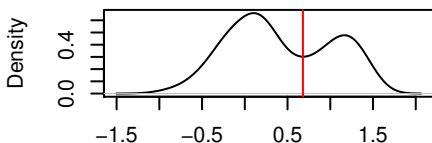

N = 416 Bandwidth = 0.1646

**PA14\_10500,ccoN**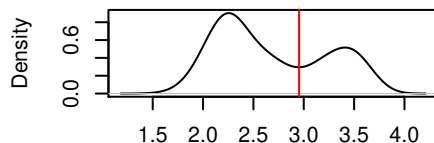

N = 416 Bandwidth = 0.1469

**PA14\_10530**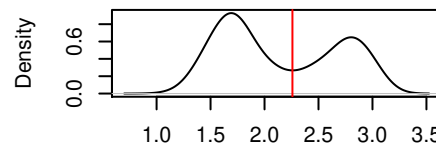

N = 416 Bandwidth = 0.1462

**PA14\_10540,fixG**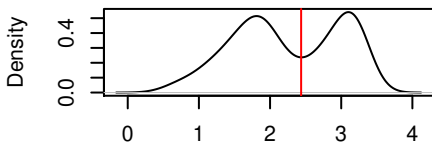

N = 416 Bandwidth = 0.2044

**PA14\_10550,cysl**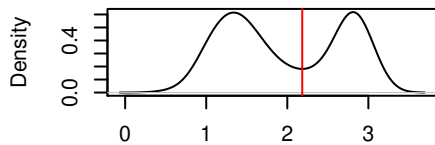

N = 416 Bandwidth = 0.1956

**PA14\_10560**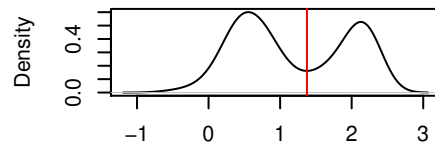

N = 416 Bandwidth = 0.212

**PA14\_10700**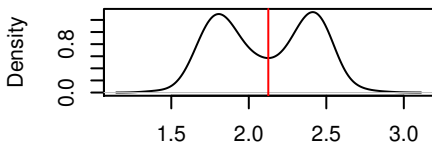

N = 416 Bandwidth = 0.0835

**PA14\_10710**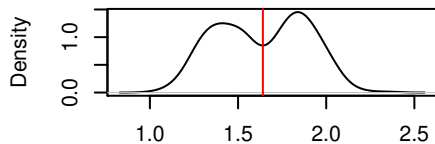

N = 416 Bandwidth = 0.06936

**PA14\_13350**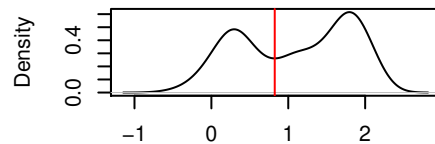

N = 416 Bandwidth = 0.1956

**PA14\_13360**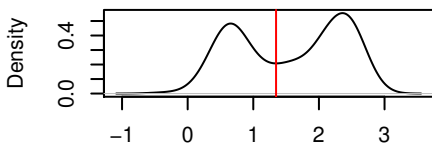

N = 416 Bandwidth = 0.2213

**PA14\_13370**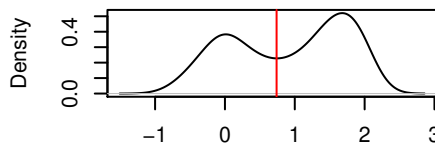

N = 416 Bandwidth = 0.2235

**PA14\_13380**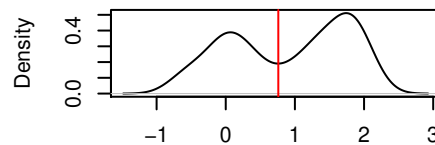

N = 416 Bandwidth = 0.2333

**PA14\_03130**

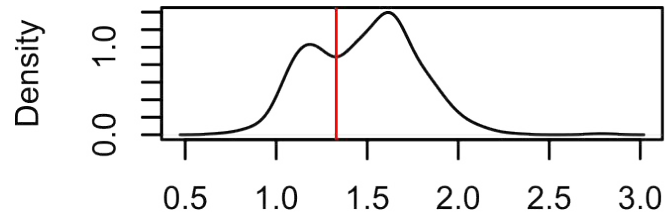

N = 416 Bandwidth = 0.07745

**PA14\_13390**

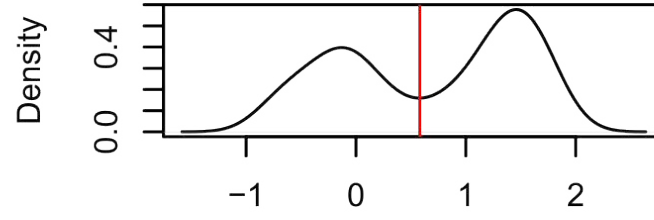

N = 416 Bandwidth = 0.2275

**PA14\_13940**

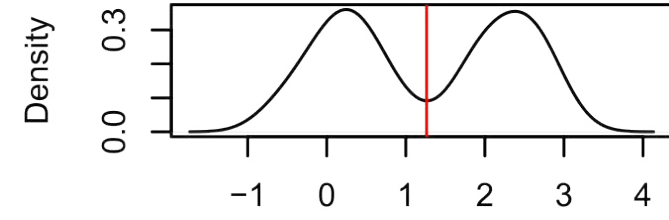

N = 416 Bandwidth = 0.3104

**PA14\_16250,lasB**

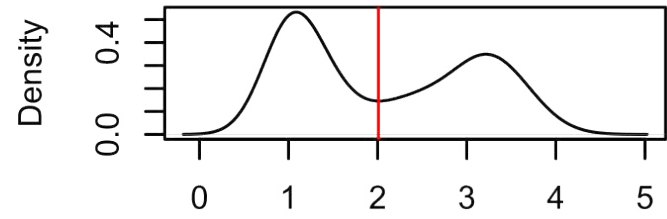

N = 416 Bandwidth = 0.2769

**PA14\_16670,cadR**

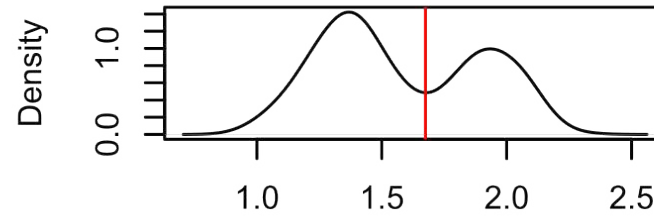

N = 416 Bandwidth = 0.0858

**PA14\_33240**

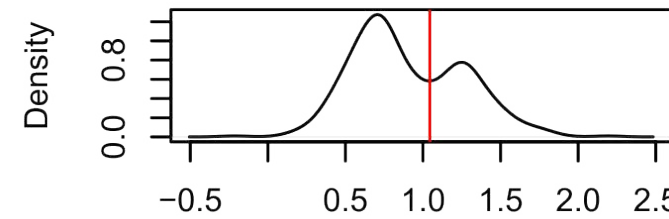

N = 416 Bandwidth = 0.09704

**PA14\_33650,pvdD**

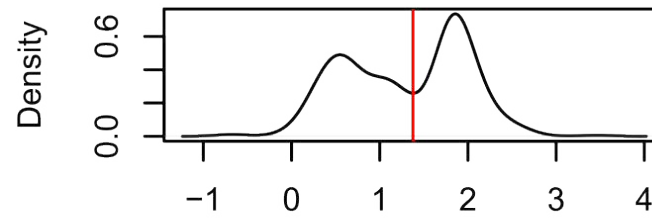

N = 416 Bandwidth = 0.186

**PA14\_33800**

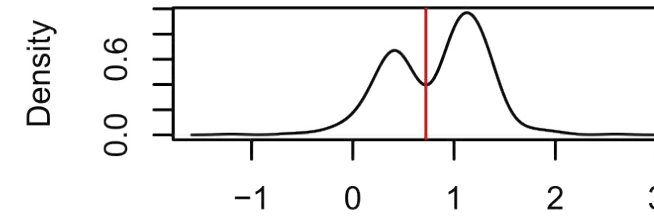

N = 416 Bandwidth = 0.1293

**PA14\_37790,pcoA**

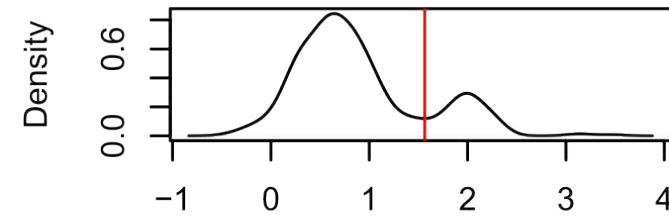

N = 416 Bandwidth = 0.131

**PA14\_18630,eprS**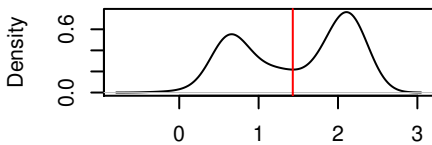

N = 416 Bandwidth = 0.1867

**PA14\_18970,pldA**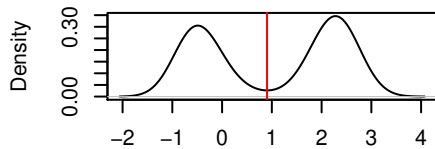

N = 416 Bandwidth = 0.3854

**PA14\_19100,rhIA**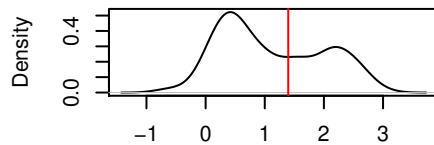

N = 416 Bandwidth = 0.2376

**PA14\_19120,rhIR**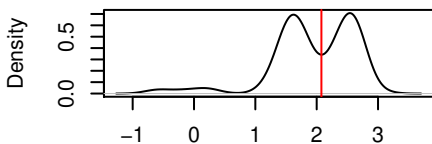

N = 416 Bandwidth = 0.1879

**PA14\_19130,rhII**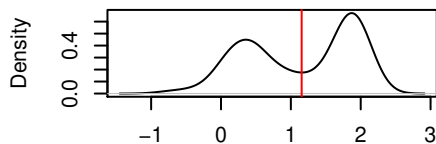

N = 416 Bandwidth = 0.2124

**PA14\_20520**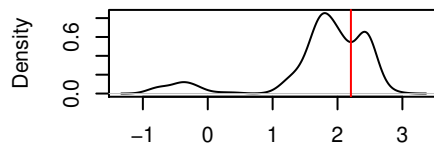

N = 416 Bandwidth = 0.1384

**PA14\_20920**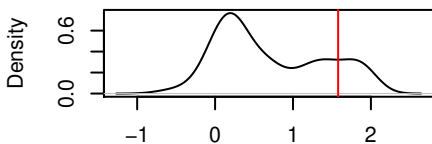

N = 416 Bandwidth = 0.1857

**PA14\_20940**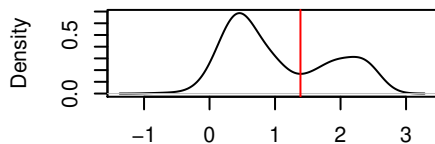

N = 416 Bandwidth = 0.215

**PA14\_20950,fabH2**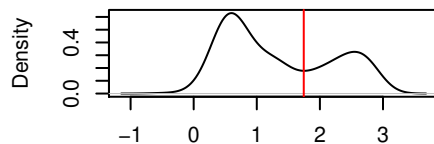

N = 416 Bandwidth = 0.2322

**PA14\_20960**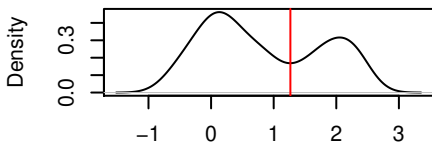

N = 416 Bandwidth = 0.2543

**PA14\_20970,cyp23**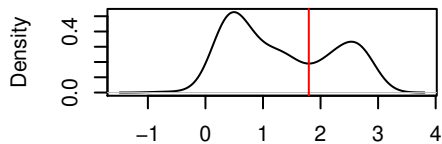

N = 416 Bandwidth = 0.2457

**PA14\_20980**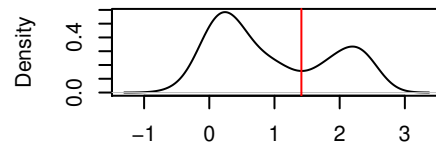

N = 416 Bandwidth = 0.2408

**PA14\_21000**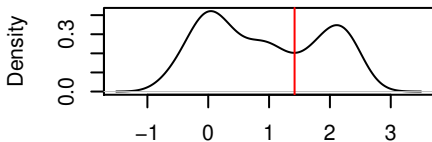

N = 416 Bandwidth = 0.2587

**PA14\_21010**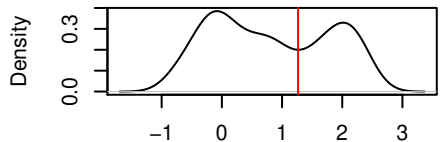

N = 416 Bandwidth = 0.265

**PA14\_21020**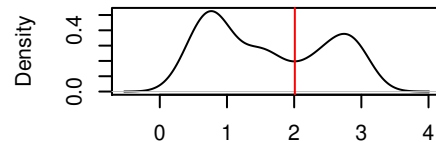

N = 416 Bandwidth = 0.2402

**PA14\_21030**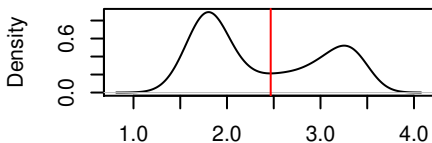

N = 416 Bandwidth = 0.1786

**PA14\_22075**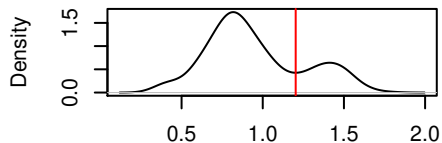

N = 416 Bandwidth = 0.0756

**PA14\_23450,orfM**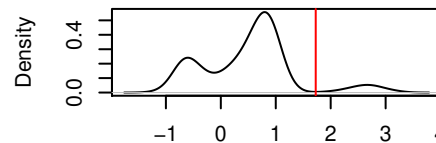

N = 416 Bandwidth = 0.2064

**PA14\_23970,xcpQ**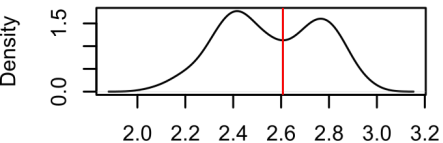

N = 416 Bandwidth = 0.05636

**PA14\_23980,xcpP**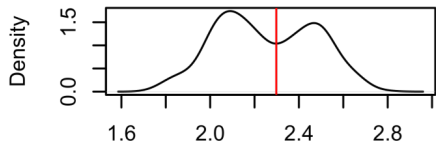

N = 416 Bandwidth = 0.0594

**PA14\_23990,xcpR**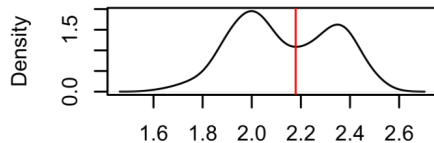

N = 416 Bandwidth = 0.05456

**PA14\_26020**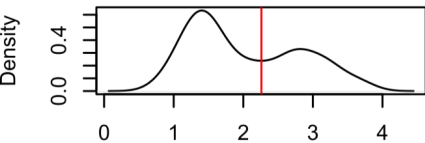

N = 416 Bandwidth = 0.2149

**PA14\_27440,trpR**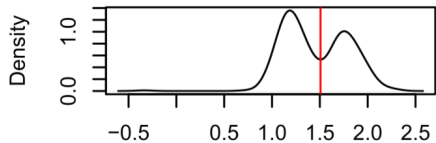

N = 416 Bandwidth = 0.09118

**PA14\_27990**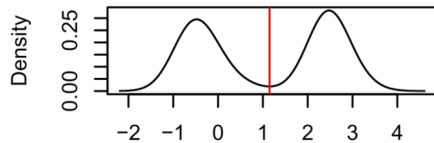

N = 416 Bandwidth = 0.4178

**PA14\_30570,potF**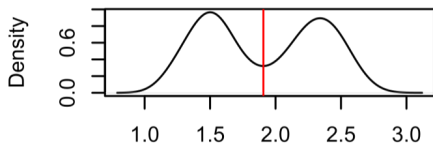

N = 416 Bandwidth = 0.1197

**PA14\_37810,pcoB**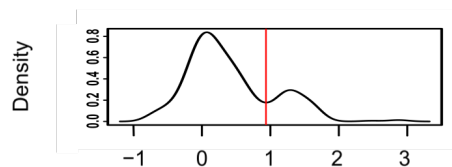

N = 416 Bandwidth = 0.148

**PA14\_36010**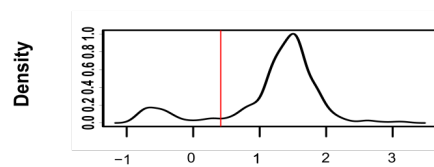

N = 416 Bandwidth = 0.1008

**PA14\_30580**

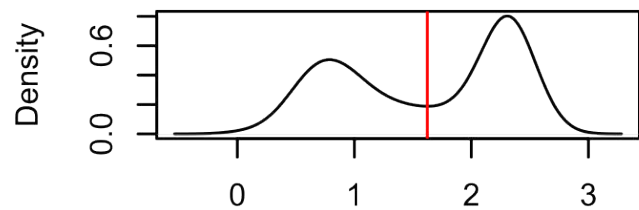

N = 416 Bandwidth = 0.1973

**PA14\_30620**

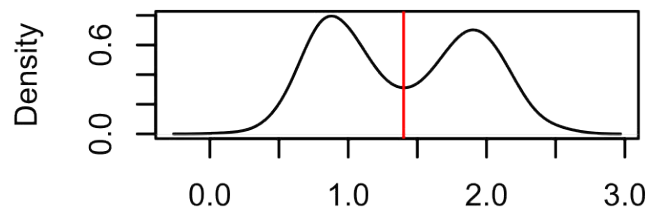

N = 416 Bandwidth = 0.1449

**PA14\_30630,pqsH**

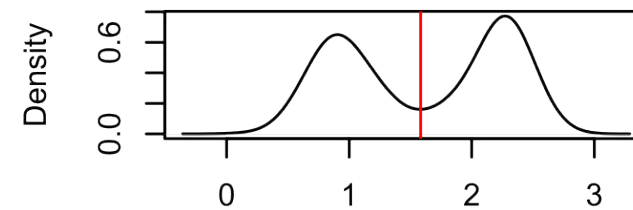

N = 416 Bandwidth = 0.1818

**PA14\_63170,cueR**

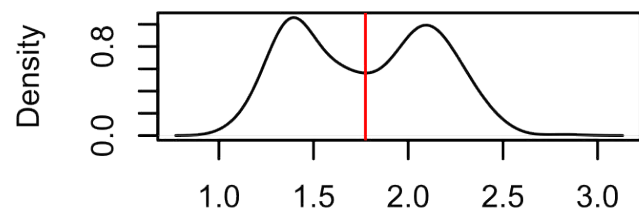

N = 416 Bandwidth = 0.1002

**PA14\_31350**

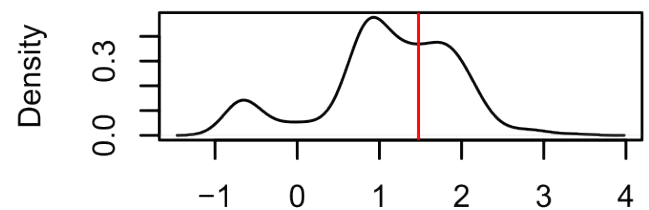

N = 416 Bandwidth = 0.1992

**PA14\_31370,tam**

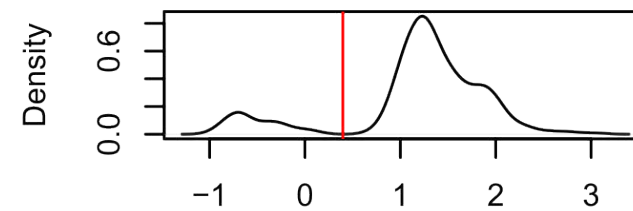

N = 416 Bandwidth = 0.1159

**PA14\_32790**

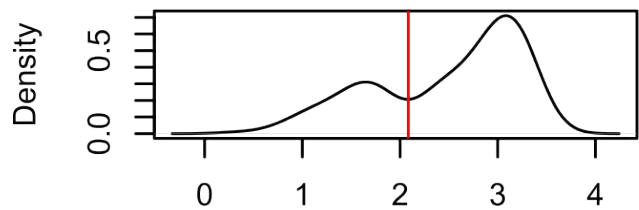

N = 416 Bandwidth = 0.2027



**PA14\_33290**

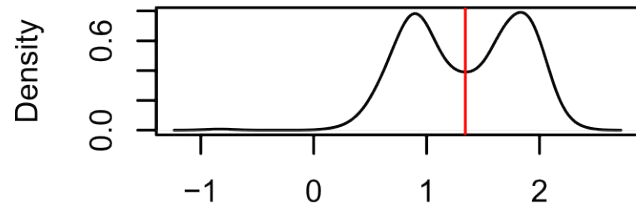

N = 416 Bandwidth = 0.1347

**PA14\_33680,fpvA**

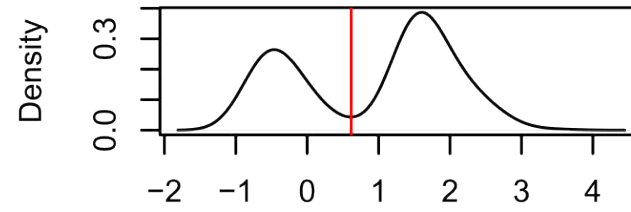

N = 416 Bandwidth = 0.3157

**PA14\_34810,mxaA**

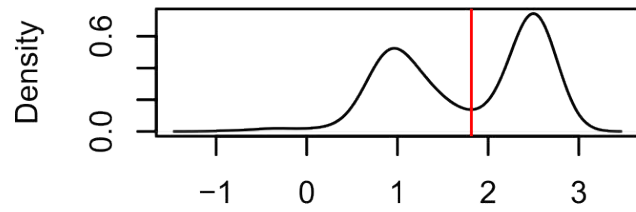

N = 416 Bandwidth = 0.2136

**PA14\_34820**

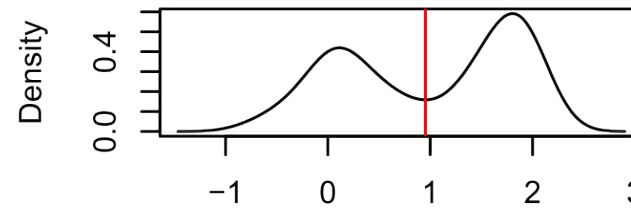

N = 416 Bandwidth = 0.2318

**PA14\_34830**

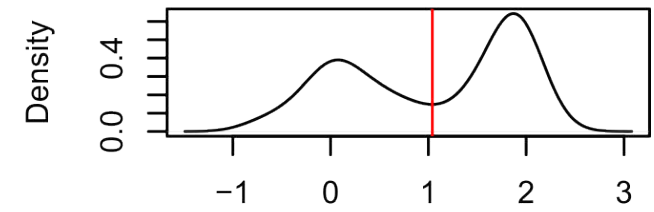

N = 416 Bandwidth = 0.241

**PA14\_34840**

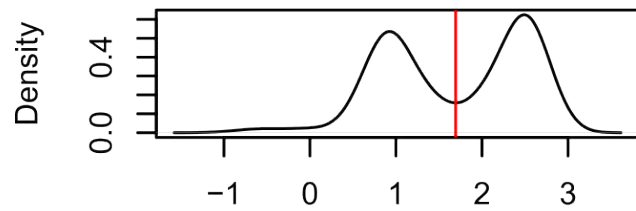

N = 416 Bandwidth = 0.2226

**PA14\_51350,phnB**

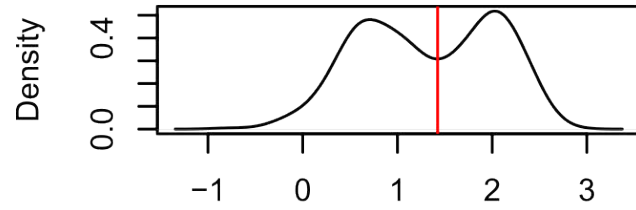

N = 416 Bandwidth = 0.1943

**PA14\_51360,phnA**

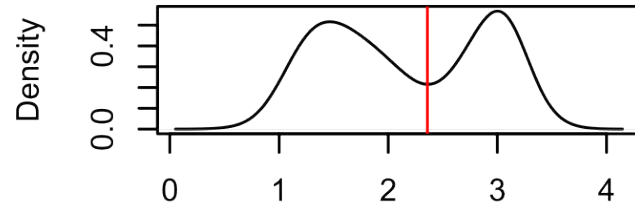

N = 416 Bandwidth = 0.2001

**PA14\_51380,pqsE**

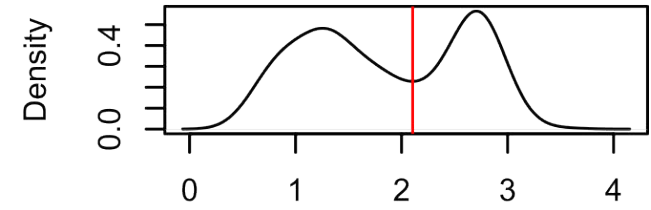

N = 416 Bandwidth = 0.2052

**PA14\_51390,pqsD**

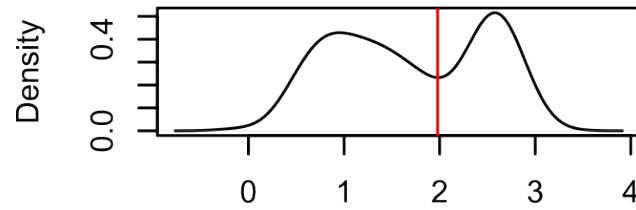

N = 416 Bandwidth = 0.2157

**PA14\_51410,pqsC**

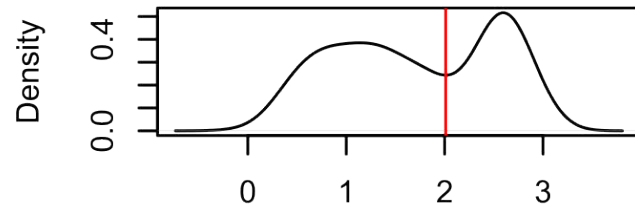

N = 416 Bandwidth = 0.2206

**PA14\_51420,pqsB**

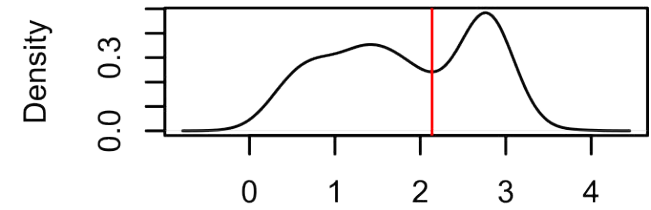

N = 416 Bandwidth = 0.2362

**PA14\_51430,pqsA**

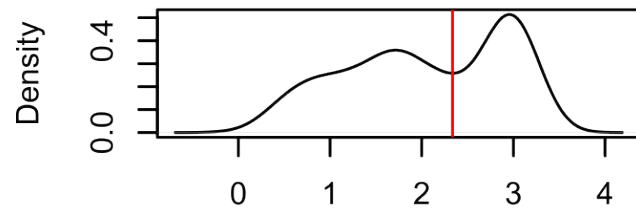

N = 416 Bandwidth = 0.2351

**PA14\_38380,amrR**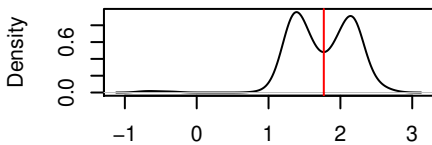

N = 416 Bandwidth = 0.1237

**PA14\_38395**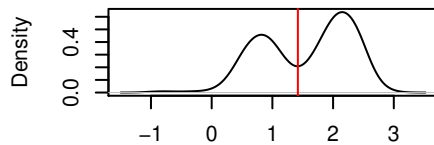

N = 416 Bandwidth = 0.1971

**PA14\_38410,amrB**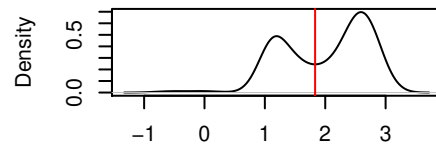

N = 416 Bandwidth = 0.1934

**PA14\_40030**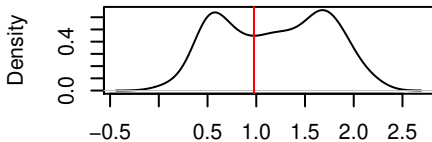

N = 416 Bandwidth = 0.1466

**PA14\_40290,lasA**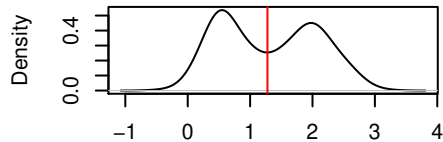

N = 416 Bandwidth = 0.2108

**PA14\_43000**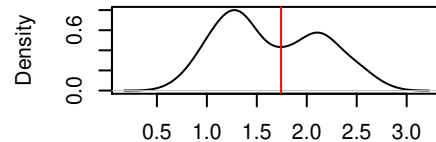

N = 416 Bandwidth = 0.1387

**PA14\_43040**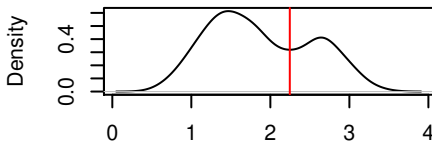

N = 416 Bandwidth = 0.1746

**PA14\_45940,lasI**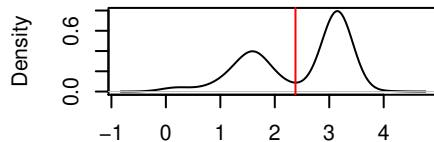

N = 416 Bandwidth = 0.2402

**PA14\_45950,rsaL**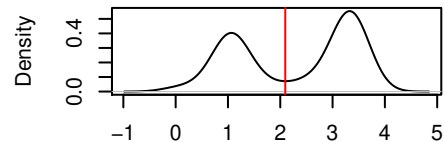

N = 416 Bandwidth = 0.3066

**PA14\_47610**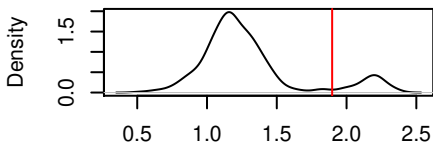

N = 416 Bandwidth = 0.05762

**PA14\_47640**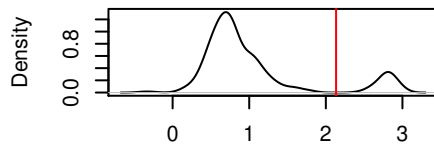

N = 416 Bandwidth = 0.09681

**PA14\_48040,aprI**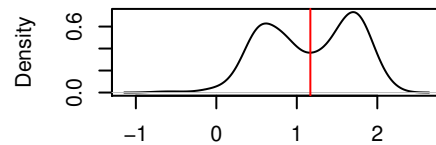

N = 416 Bandwidth = 0.1521

**PA14\_48060,aprA**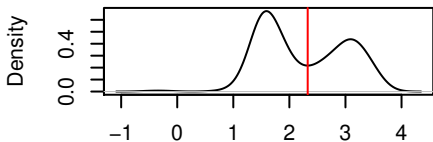

N = 416 Bandwidth = 0.2057

**PA14\_48090,aprF**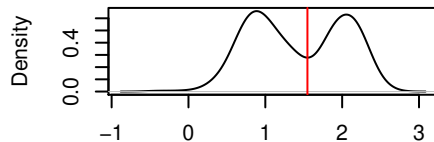

N = 416 Bandwidth = 0.1648

**PA14\_48100,aprE**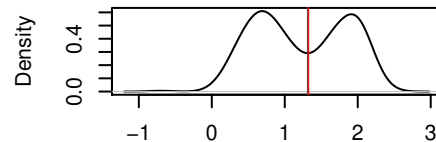

N = 416 Bandwidth = 0.1706

**PA14\_48115,aprD**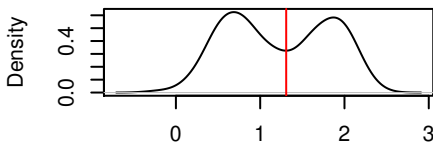

N = 416 Bandwidth = 0.1649

**PA14\_48140,aprX**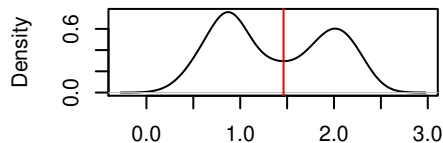

N = 416 Bandwidth = 0.159

**PA14\_48560**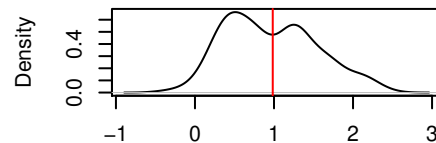

N = 416 Bandwidth = 0.1566

**PA14\_37745**

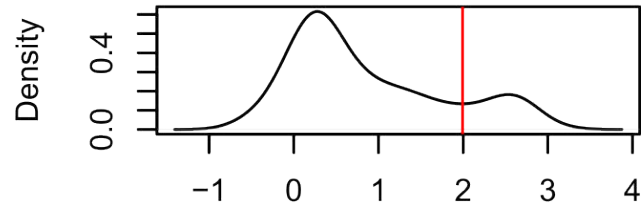

N = 416 Bandwidth = 0.2469

**PA14\_49520,pyoS3A**

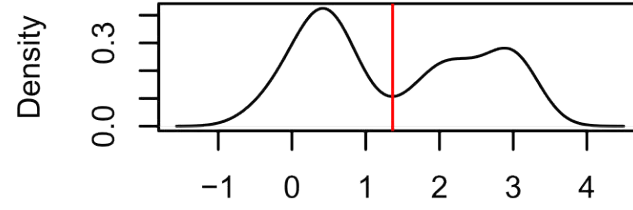

N = 416 Bandwidth = 0.3149

**PA14\_49530**

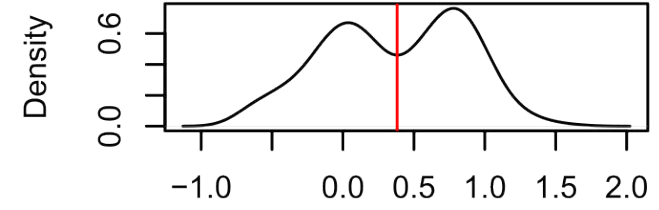

N = 416 Bandwidth = 0.1343

**PA14\_50240**

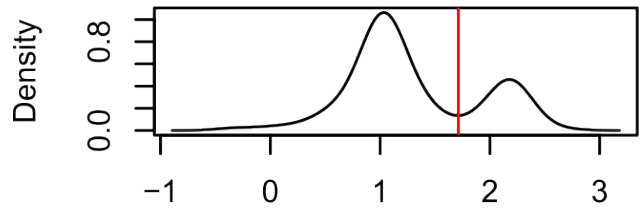

N = 416 Bandwidth = 0.1605

**PA14\_50250,flhS**

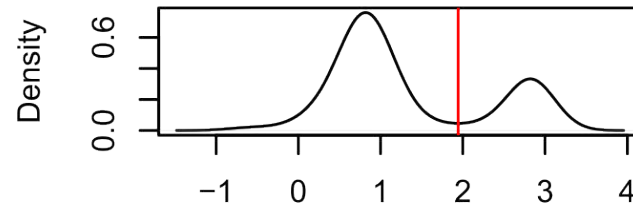

N = 416 Bandwidth = 0.2538

**PA14\_50270,flhD**

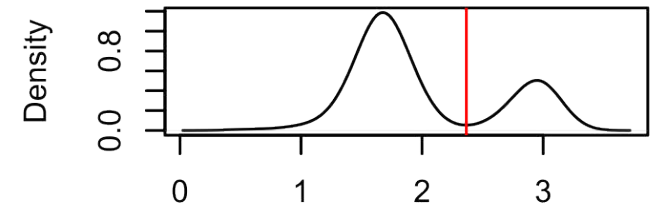

N = 416 Bandwidth = 0.1615

**PA14\_50280,flaG**

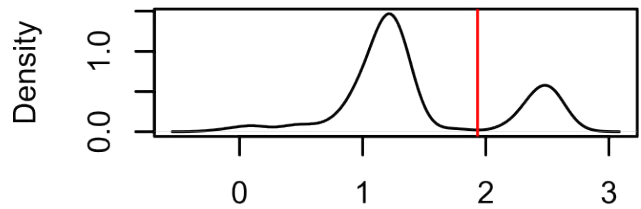

N = 416 Bandwidth = 0.1075

**PA14\_50300**

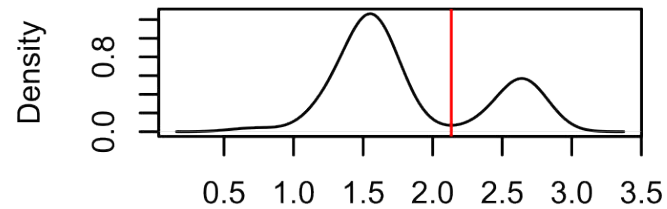

N = 416 Bandwidth = 0.1443

**PA14\_50340,flgL**

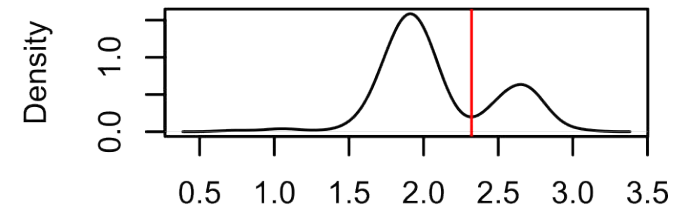

N = 416 Bandwidth = 0.1049

**PA14\_51600**

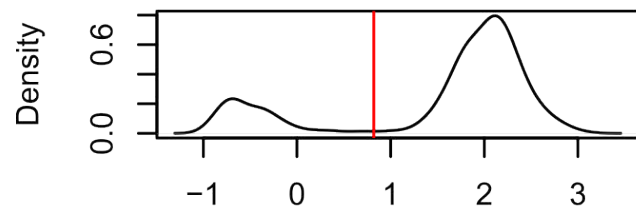

N = 416 Bandwidth = 0.1343

**PA14\_51610**

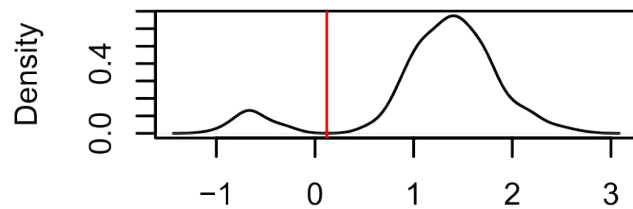

N = 416 Bandwidth = 0.1276

**PA14\_53250,cpbD**

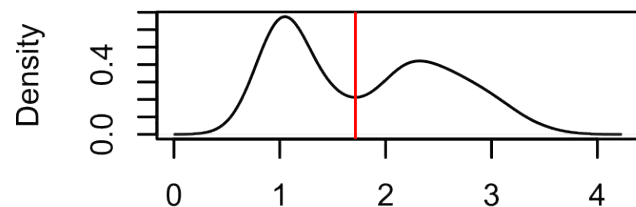

N = 416 Bandwidth = 0.2073

**PA14\_53650**

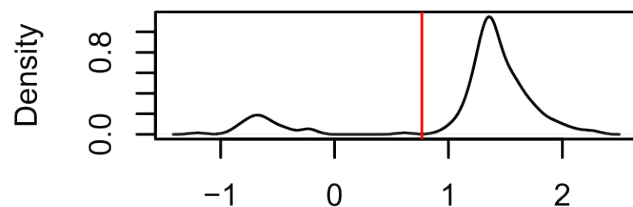

N = 416 Bandwidth = 0.07098

**PA14\_53660**

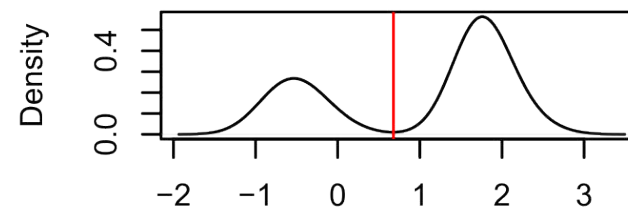

N = 416 Bandwidth = 0.3148

**PA14\_54170,putA**

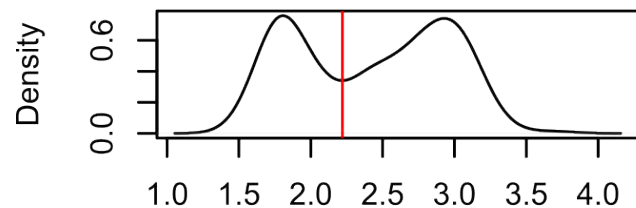

N = 416 Bandwidth = 0.1431

**PA14\_55400**

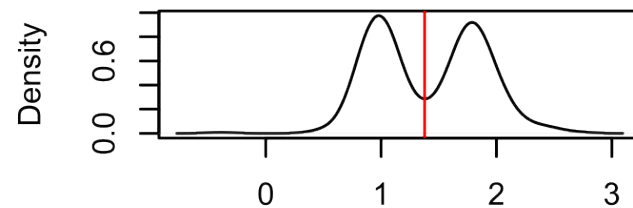

N = 416 Bandwidth = 0.1267

**PA14\_55410**

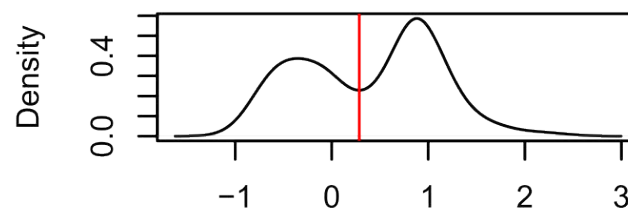

N = 416 Bandwidth = 0.1968

**PA14\_59220**

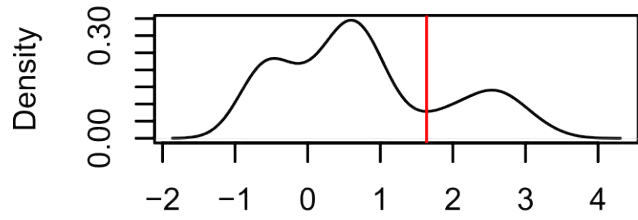

N = 416 Bandwidth = 0.3169

**PA14\_60280,fimU**

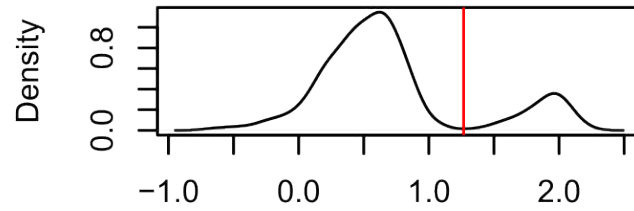

N = 416 Bandwidth = 0.09272

**PA14\_60290,pilW**

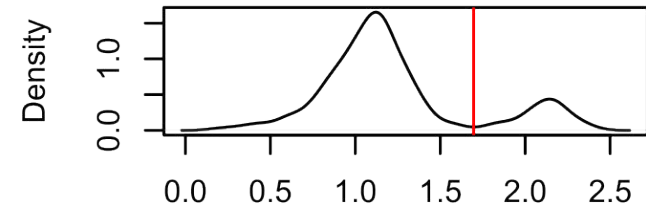

N = 416 Bandwidth = 0.06781

**PA14\_60300,pilX**

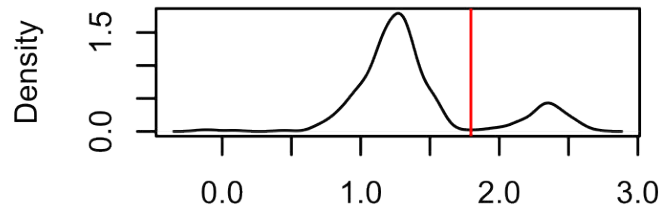

N = 416 Bandwidth = 0.0646

**PA14\_60310,pilY1**

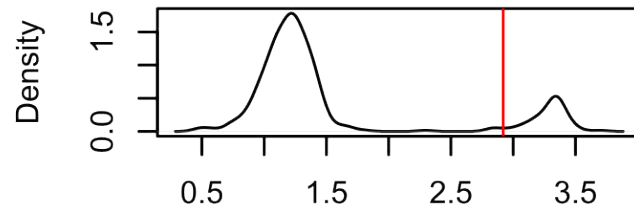

N = 416 Bandwidth = 0.06137

**PA14\_60750,pra**

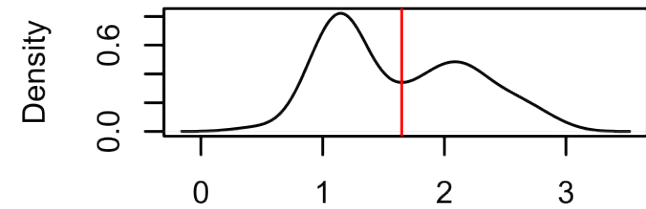

N = 416 Bandwidth = 0.16

**PA14\_61870**

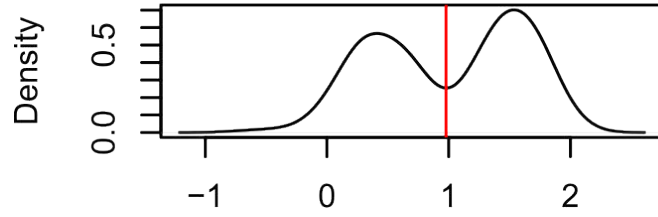

N = 416 Bandwidth = 0.1664

**PA14\_66100**

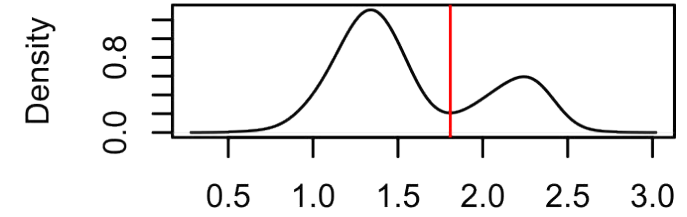

N = 416 Bandwidth = 0.1178

**PA14\_68940**

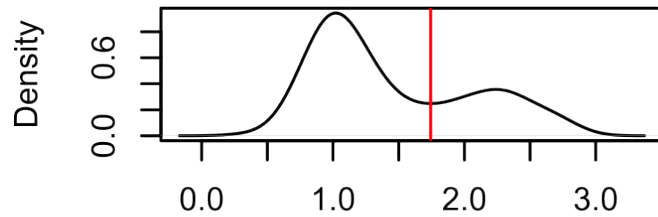

N = 416 Bandwidth = 0.1637

**PA14\_69170**

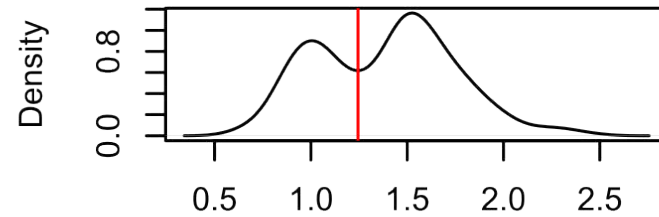

N = 416 Bandwidth = 0.09738

**PA14\_69770**

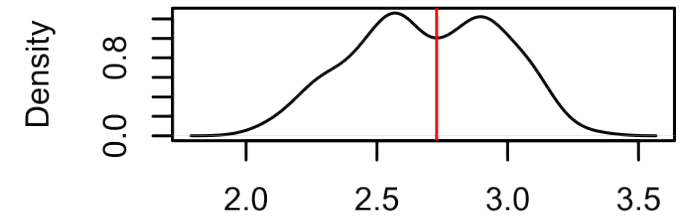

N = 416 Bandwidth = 0.0748



## Supplementary Table

Supplementary Table 1: Oligonucleotides used in this study

| Name             | Sequence (5' - 3')                                                                                                    | Goal of the primer                                                                                    | Other characteristics                                                                                                                        |
|------------------|-----------------------------------------------------------------------------------------------------------------------|-------------------------------------------------------------------------------------------------------|----------------------------------------------------------------------------------------------------------------------------------------------|
| rhIR_PA14_spc2_F | <b>gcgcg</b> GGCTTCGATTACTACGCCTA                                                                                     | Oligonucleotide in the sense orientation for the construction of the <i>rhIR</i> -targeting sgRNA     | The nt depicted as bold characters were added to reconstruct the Eco31I protruding ends after plasmid hybridization for cloning in pS448-CsR |
| rhIR_PA14_spc2_R | <b>aaac</b> TAGGCGTAGTAATCGAAGCC <b>c</b>                                                                             | Oligonucleotide in the antisense orientation for the construction of the <i>rhIR</i> -targeting sgRNA | The nt depicted as bold characters were added to reconstruct the Eco31I protruding ends after plasmid hybridization for cloning in pS448-CsR |
| phoB_PA14_spc2_F | <b>gcgcg</b> ACGGCGATCATCTCGCGAAT                                                                                     | Oligonucleotide in the sense orientation for the construction of the <i>phoB</i> -targeting sgRNA     | The nt depicted as bold characters were added to reconstruct the Eco31I protruding ends after plasmid hybridization for cloning in pS448-CsR |
| phoB_PA14_spc2_R | <b>aaac</b> ATTGCGGAGATGATCGCCGT <b>c</b>                                                                             | Oligonucleotide in the antisense orientation for the construction of the <i>phoB</i> -targeting sgRNA | The nt depicted as bold characters were added to reconstruct the Eco31I protruding ends after plasmid hybridization for cloning in pS448-CsR |
| rhIR_PA14(+)-Rec | cgggccaattctgctgtgatgcattttatcgatcagg<br>gcttactgca <b>ATGTGA</b> agcgtagggcgcgccg<br>gccggcgcgccctaccagatctggcagggtg | Recombineering oligonucleotide used for the deletion of <i>rhIR</i> in PA14                           | The start (ATG) and stop codons of <i>rhIR</i> are depicted as bold characters                                                               |
| phoB_PA14(+)-Rec | ttcgttatctaagcggcgcaagacagatcgacc<br>gaggcaagacc <b>ATGTGA</b> ccccgccccggc<br>cgccccggcgccggagtcgtttcccctggacggt     | Recombineering oligonucleotide used for the deletion of <i>phoB</i> in PA14                           | The start (ATG) and stop codons of <i>phoB</i> are depicted as bold characters                                                               |
| rhIR_PA14-Seq-F  | CTGTCGGCGTTTCATGGAATTG                                                                                                | Forward primer used for PCR and sequencing of the <i>rhIR</i> deletion                                | T <sub>m</sub> = 58°C                                                                                                                        |
| rhIR_PA14-Seq-R  | AAGACTTGATGCCGGTAGCGTC                                                                                                | Reverse primer used for PCR and sequencing of the <i>rhIR</i> deletion                                | T <sub>m</sub> = 60°C                                                                                                                        |
| phoB_PA14-Seq-F  | CGCCAGGTGGATTCTGTTCATCG                                                                                               | Forward primer used for PCR and sequencing of the <i>phoB</i> deletion                                | T <sub>m</sub> = 61°C                                                                                                                        |
| phoB_PA14-Seq-R  | GCGTTGCAGGTGGTAGATATTG                                                                                                | Reverse primer used for PCR and sequencing of the <i>phoB</i> deletion                                | T <sub>m</sub> = 57°C                                                                                                                        |

|           |                          |                                                                                  |                       |
|-----------|--------------------------|----------------------------------------------------------------------------------|-----------------------|
| aaSSR-1F  | TGAGCCAAGTAGCCAGGGTCG    | Forward primer used to check the presence of <i>ssr</i> gene by PCR              | T <sub>m</sub> = 60°C |
| aaSSR-1R  | GATTTGTAGACGTTGGCAGCGCAG | Reverse primer used to check the presence of <i>ssr</i> gene by PCR              | T <sub>m</sub> = 60°C |
| aaCas9-1F | AAGCACAAGTGTCTGGACAAGG   | Forward primer used to check the presence of <i>S. pyogenes cas9</i> gene by PCR | T <sub>m</sub> = 58°C |
| aaCas9-1R | TCACTCAAACCTCCACGTTTCAGC | Reverse primer used to check the presence of <i>S. pyogenes cas9</i> gene by PCR | T <sub>m</sub> = 58°C |

## Supplementary Data

**Supplementary Data 1: Bimodally expressed genes and their affiliation to clusters containing genes with similar expression patterns across clinical isolates.** KEGG pathways were assigned using the R package KEGGREST (version 1.26.1).

**Supplementary Data 2:** Genes that are significantly ( $FDR \leq 0.05$ ) and relevantly ( $\log_2FC \geq 1$ ;  $\log_2FC \leq -1$ ) differentially expressed in clinical *lasR*<sup>\*</sup> compared to *lasR*<sup>WT</sup> isolates under planktonic growth conditions ( $OD_{600} = 2$ ).

**Supplementary Data 3:** Genes that are significantly ( $FDR \leq 0.05$ ) and relevantly ( $\log_2FC \geq 1$ ;  $\log_2FC \leq -1$ ) differentially regulated between PA14 $\Delta$ /*lasR* compared to PA14 WT under planktonic growth conditions ( $OD_{600} = 2$ ).

**Supplementary Data 4:** Genes that are significantly ( $FDR \leq 0.05$ ) and relevantly ( $\log_2FC \geq 1$ ;  $\log_2FC \leq -1$ ) differentially regulated between clinical *lasR*<sup>\*</sup> compared to *lasR*<sup>WT</sup> isolates under biofilm growth conditions (48h growth in LB at 37°C).

**Supplementary Data 5:** Genes that are significantly ( $FDR \leq 0.05$ ) and relevantly ( $\log_2FC \geq 1$ ;  $\log_2FC \leq -1$ ) differentially regulated between PA14 $\Delta$ /*lasR* compared to PA14 WT under biofilm growth conditions (48h growth in LB at 37°C).

**Supplementary Data 6: Strain-specific as well as common transcriptional signatures associated with *lasR* deficiency.** Genes (PA14 Locus Tags) that are expressed below  $\log_2FC = -1$  in the respective number of *lasR*<sup>\*</sup> isolates compared to all *lasR*<sup>WT</sup> isolates (sheet "lasRmut vs all lasRWT down"). Genes (PA14 Locus Tags) that are expressed above  $\log_2FC = 1$  in the respective number of *lasR*<sup>\*</sup> isolates compared to all *lasR*<sup>WT</sup> isolates (sheet "lasRmut vs all lasRWT up").

**Supplementary Data 7: Differential gene expression between biofilm and planktonic growth in clinical isolates harboring a *lasR* wildtype allele or a *lasR* deficiency.** Genes that are significantly ( $FDR \leq 0.05$ ) and relevantly ( $\log_2FC \geq 1$ ;  $\log_2FC \leq -1$ ) differentially expressed in clinical *lasR*<sup>WT</sup> under planktonic growth conditions ( $OD_{600} = 2$ ) compared to *lasR*<sup>WT</sup> isolates under biofilm growth conditions (48h growth in LB at 37°C) (sheet "lasR WT PL vs BF"). Genes that are significantly ( $FDR \leq 0.05$ ) and relevantly ( $\log_2FC \geq 1$ ;  $\log_2FC \leq -1$ ) differentially expressed in clinical *lasR*<sup>\*</sup> isolates under planktonic growth conditions ( $OD_{600} = 2$ ) compared to *lasR*<sup>\*</sup> isolates under biofilm growth conditions (48h growth in LB at 37°C) (sheet "lasR Mutants PL vs BF").
